# Supplementary material for: Copper-catalyzed synthesis of benzoxazoles via tandem cyclization of 2-halophenols with amidines
Source: Royal Society of Chemistry journal article supplement (doi:10.1039/c6ob01264g), 2016-01-01

## Supporting Information

### Copper-Catalyzed Synthesis of Benzoxazoles *via* Tandem Cyclization of 2-halophenols with Amidines

Abhishek R. Tiwari<sup>a</sup> and Bhalchandra M. Bhanage<sup>a\*</sup>

<sup>a</sup> Department of Chemistry, Institute of Chemical Technology (ICT), Mumbai, India.  
bm.bhanage@gmail.com, bm.bhanage@ictmumbai.edu.in.  
Fax: +91 2233611020; Tel : +91 2233612601

#### Table of Contents

|                                                                |        |
|----------------------------------------------------------------|--------|
| Copies of <sup>1</sup> H and <sup>13</sup> C NMR Spectras..... | S2-S18 |
|----------------------------------------------------------------|--------|

**<sup>1</sup>H NMR and <sup>13</sup>C NMR spectra of 2-phenylbenzo[d]oxazole (3aa)**

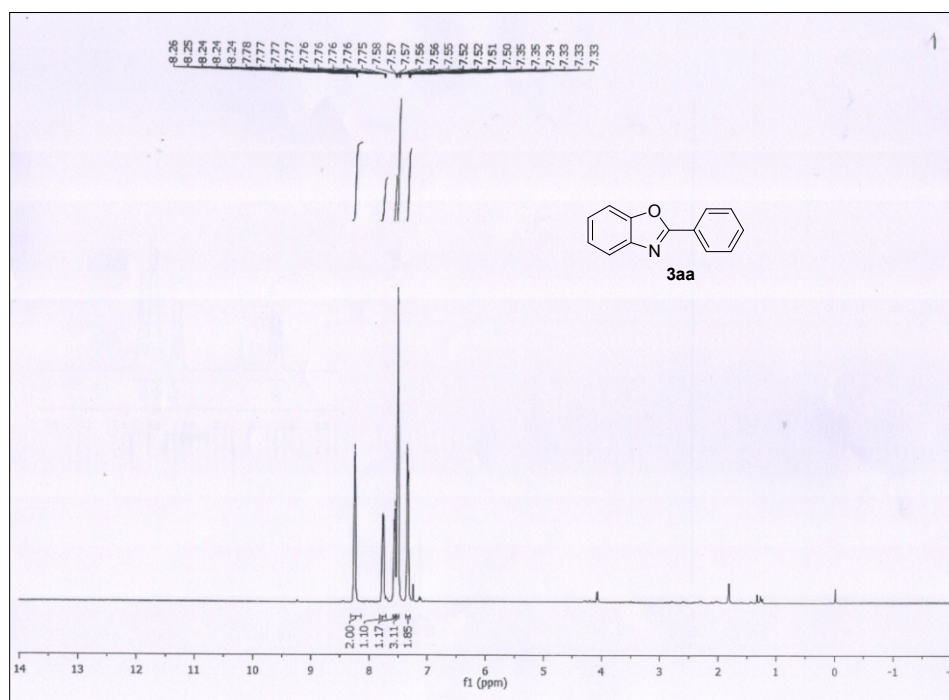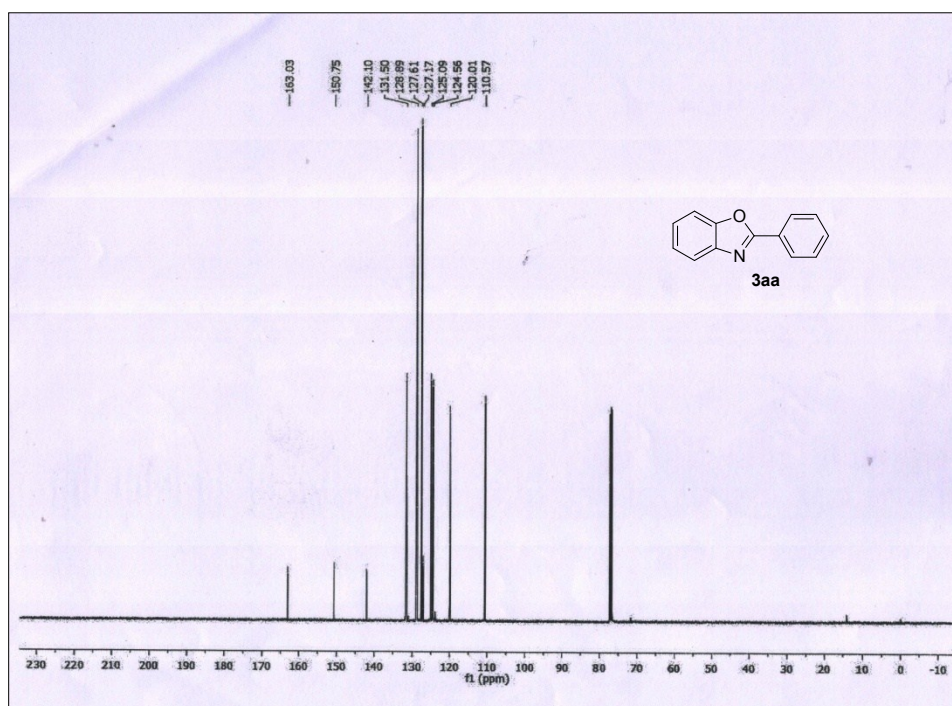

**<sup>1</sup>H NMR and <sup>13</sup>C NMR spectra of 5-methyl-2-phenylbenzo[d]oxazole (3ca)**

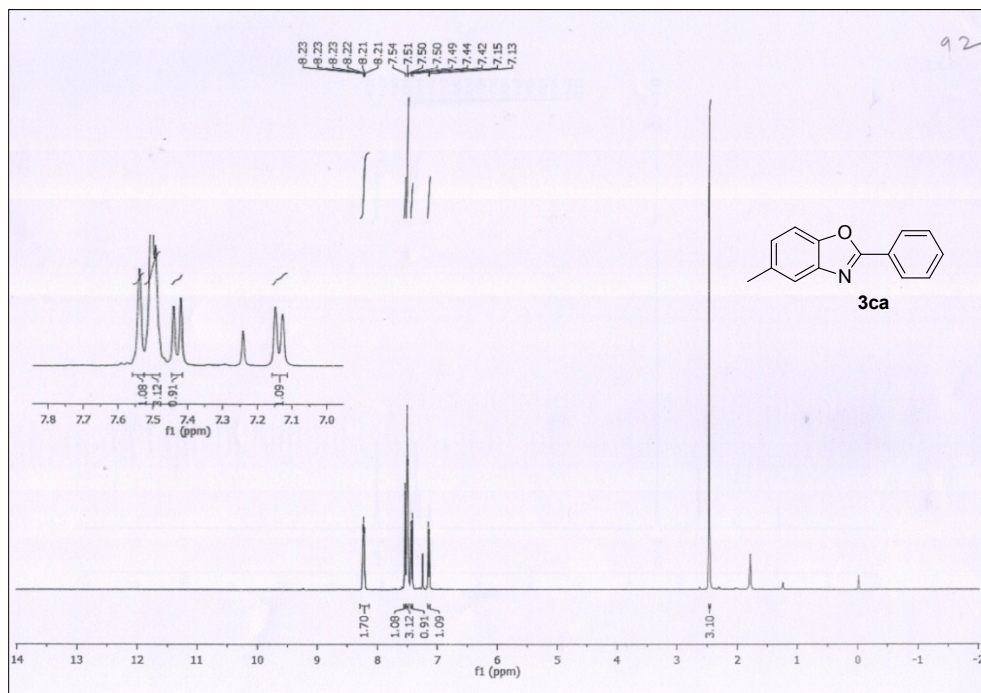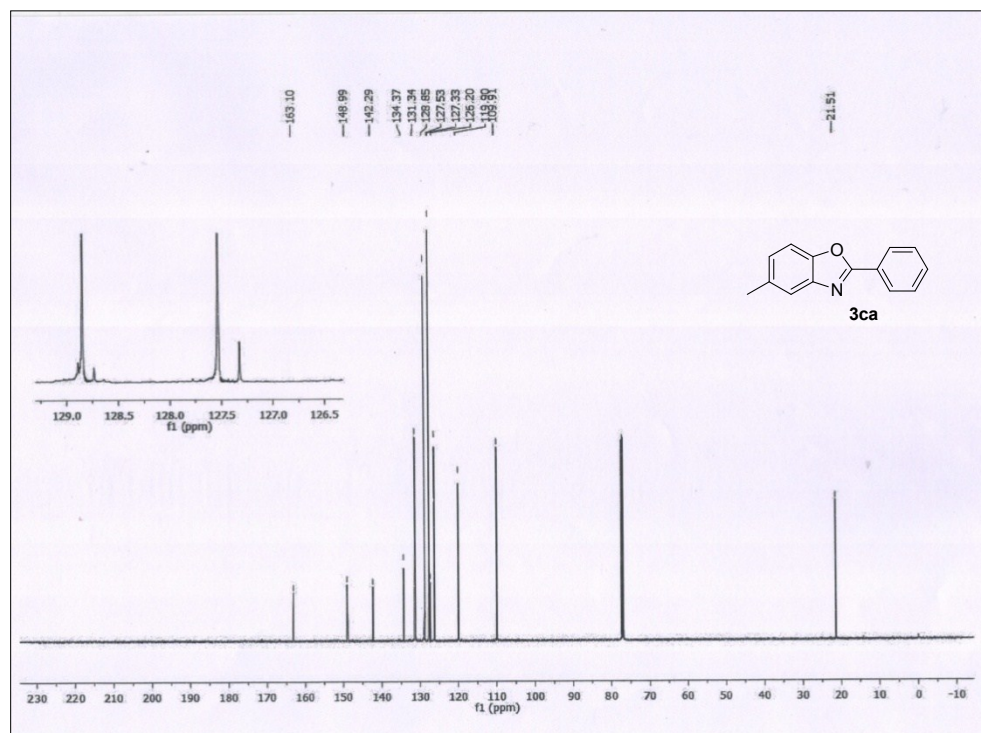



**<sup>1</sup>H NMR and <sup>13</sup>C NMR spectra of 5-bromo-2-phenylbenzo[d]oxazole (3da)**

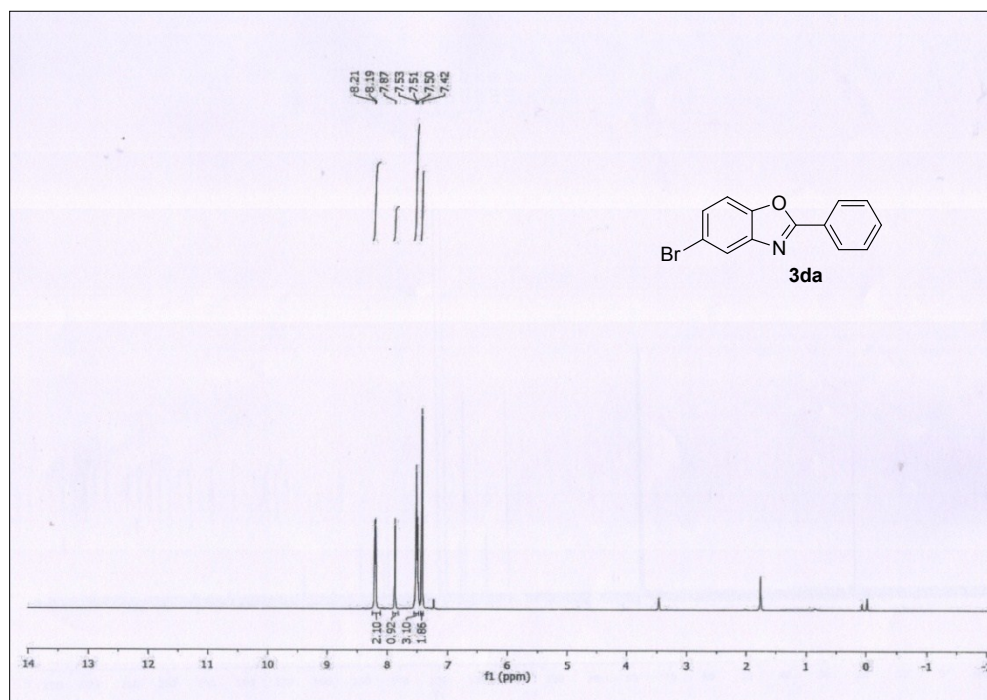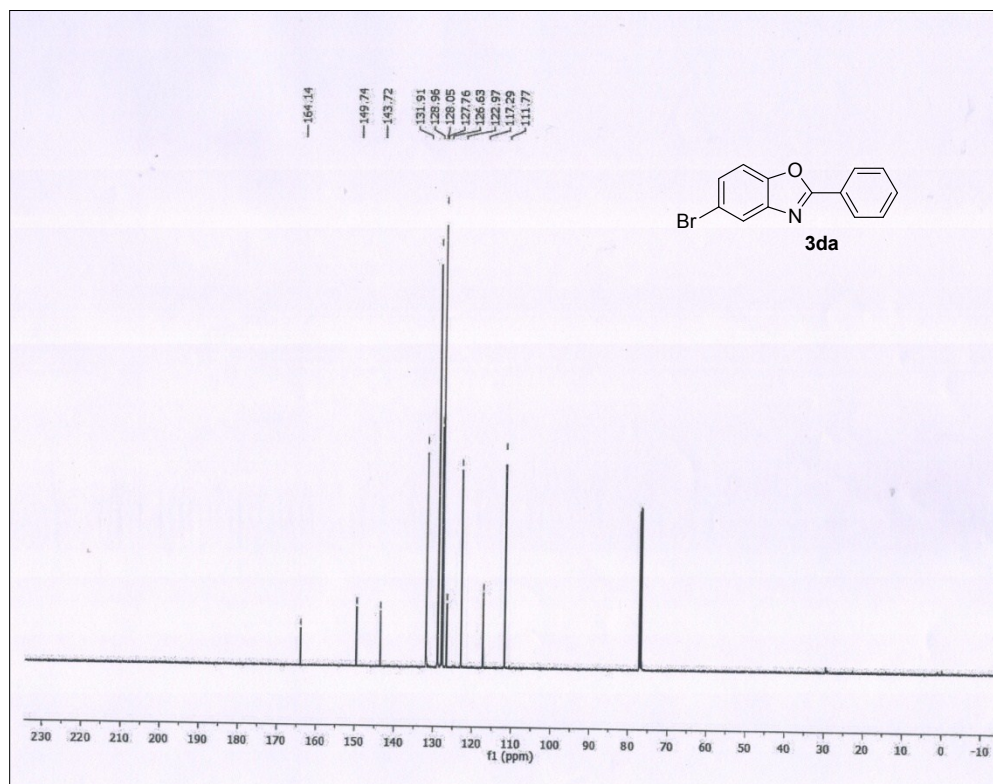

**<sup>1</sup>H NMR and <sup>13</sup>C NMR spectra of 5-fluoro-2-phenylbenzo[d]oxazole (3ea)**

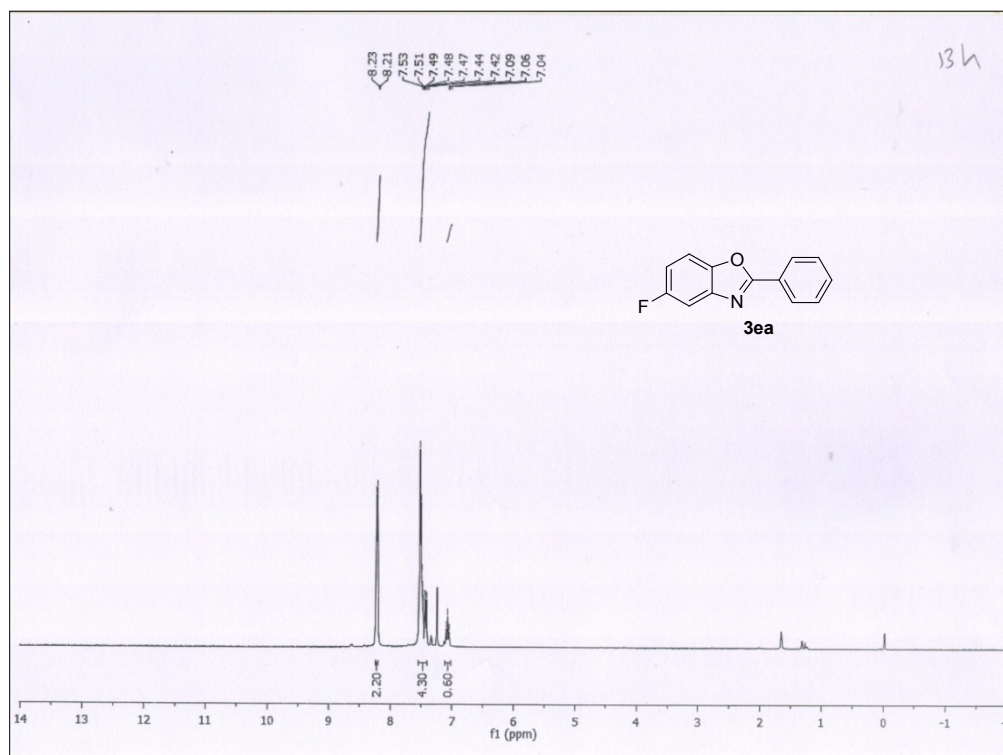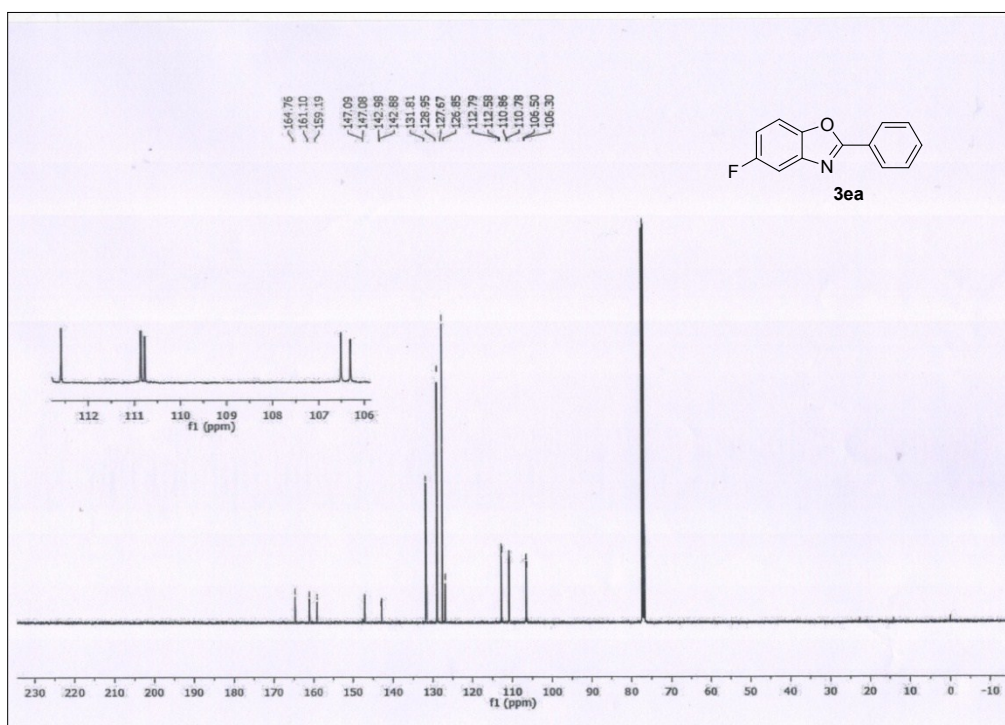



**<sup>1</sup>H NMR and <sup>13</sup>C NMR spectra of 2-phenylbenzo[d]oxazole-5-carbonitrile (3fa)**

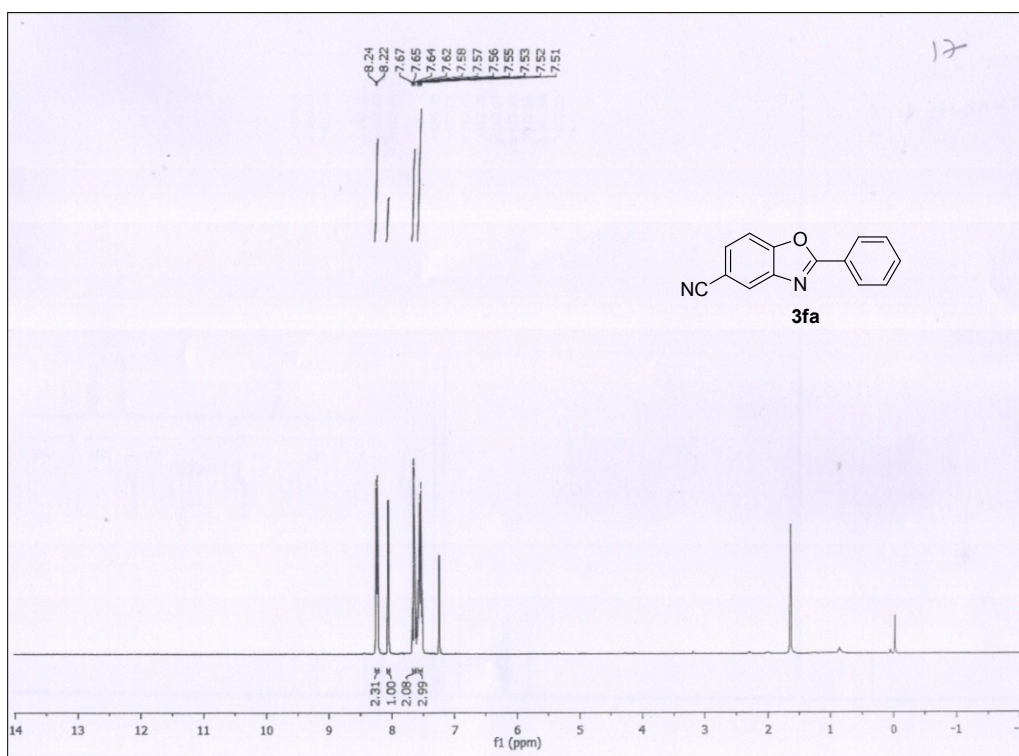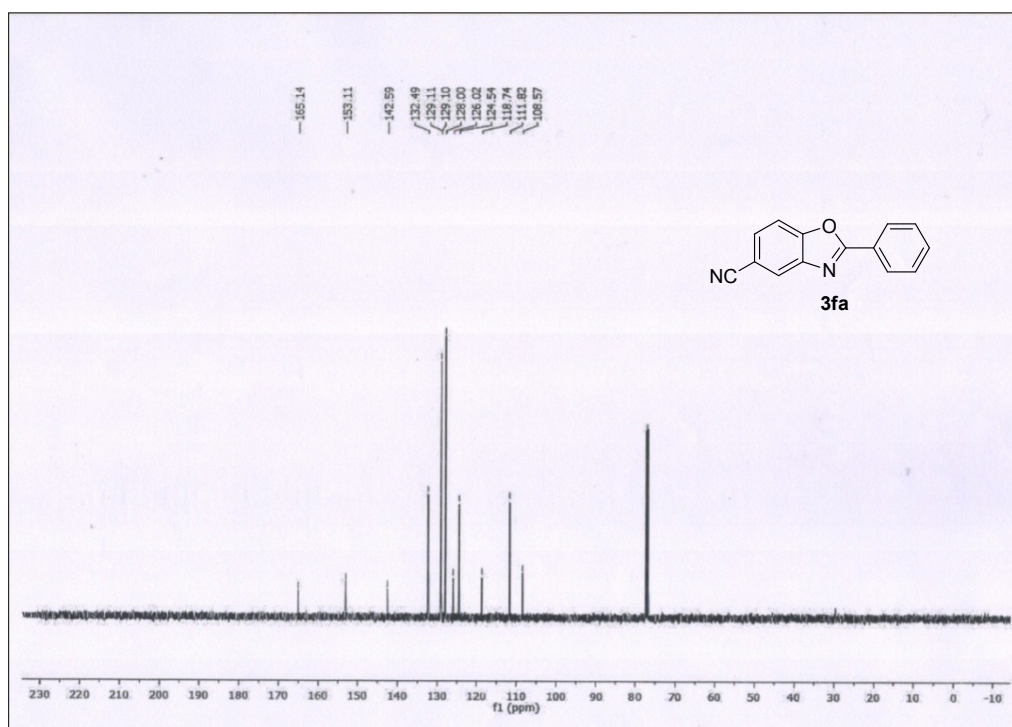

**<sup>1</sup>H NMR and <sup>13</sup>C NMR spectra of 2-p-tolylbenzo[d]oxazole (3ab)**

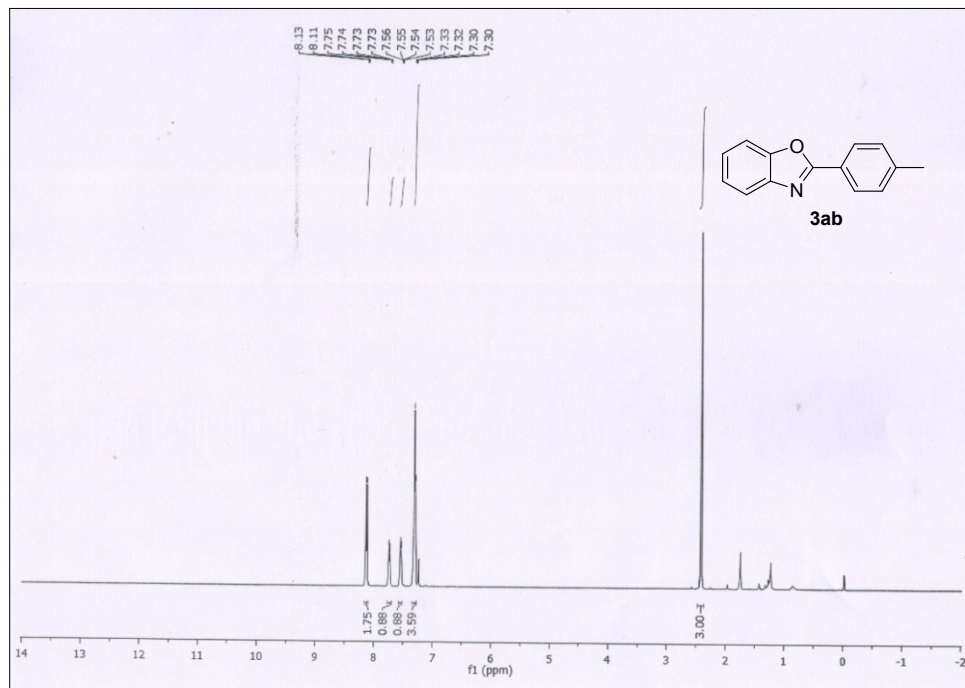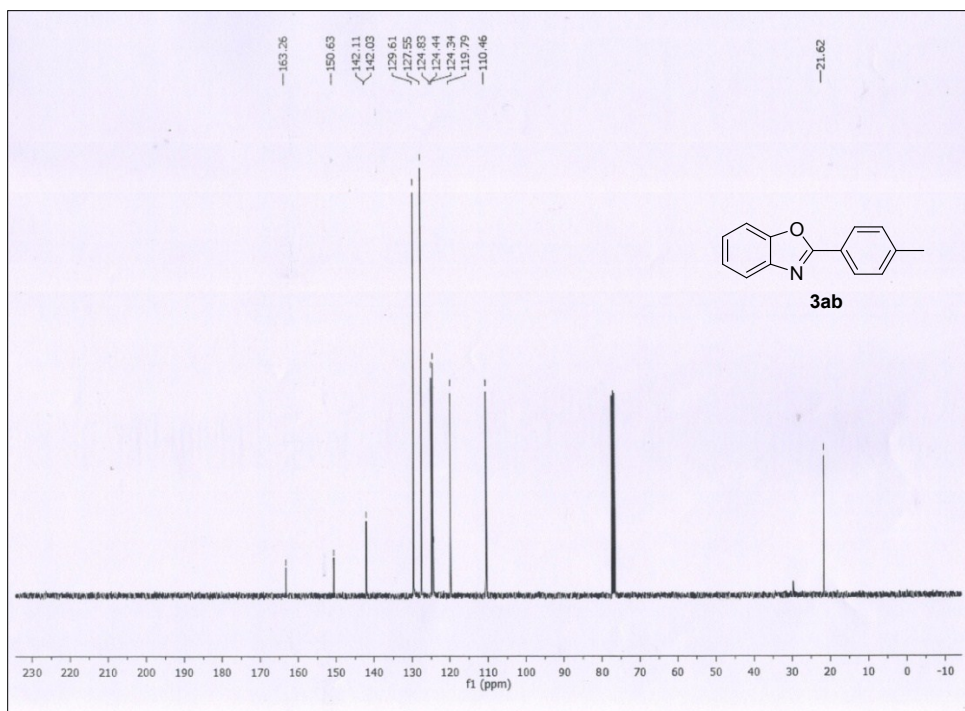

**<sup>1</sup>H NMR and <sup>13</sup>C NMR spectra of 2-(4-bromophenyl)benzo[d]oxazole (3ac)**

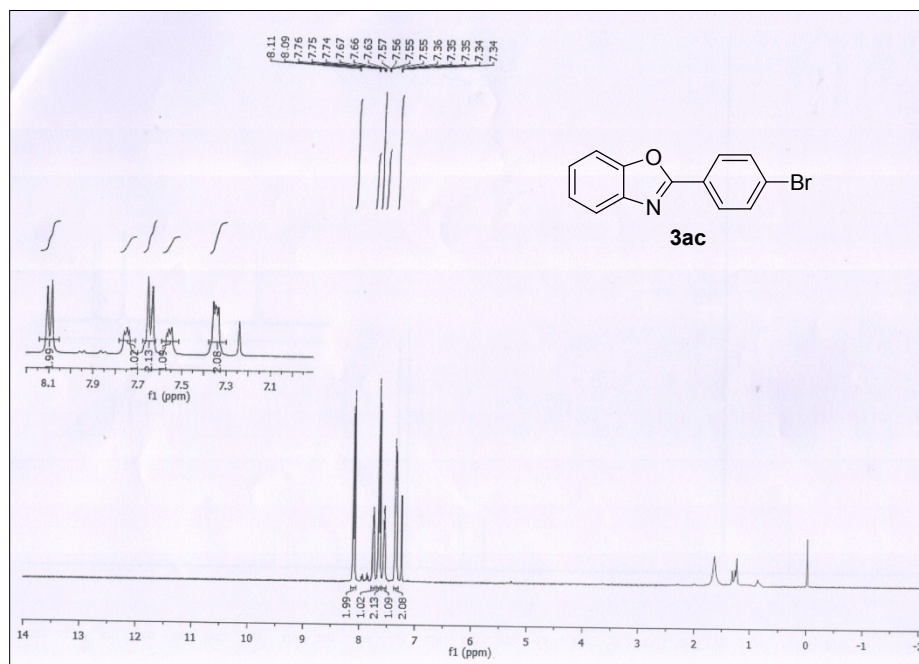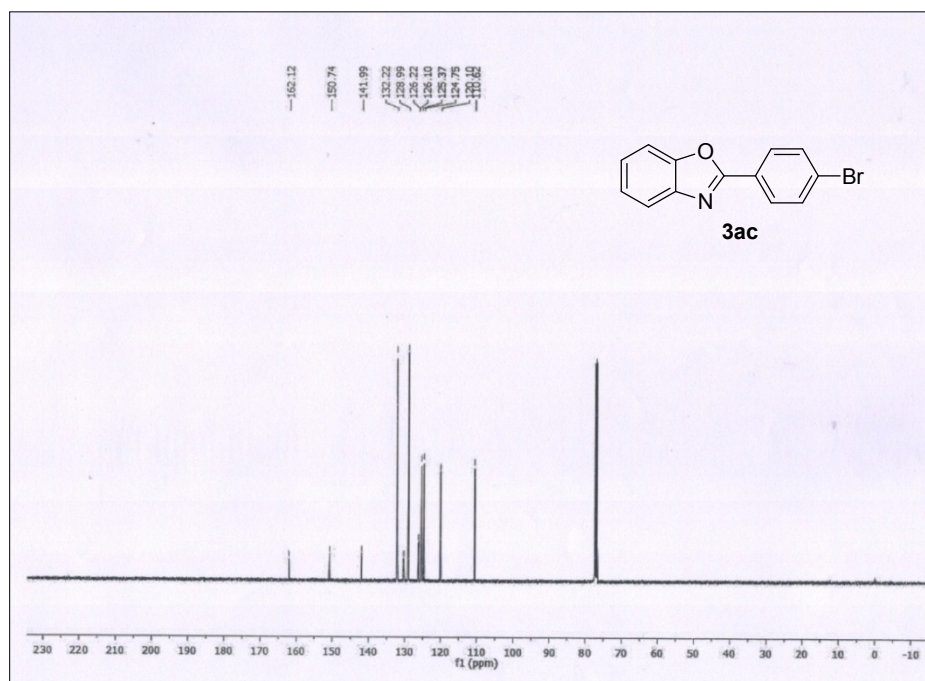



**<sup>1</sup>H NMR and <sup>13</sup>C NMR spectra of 2-(4-fluorophenyl)benzo[d]oxazole (3ad)**

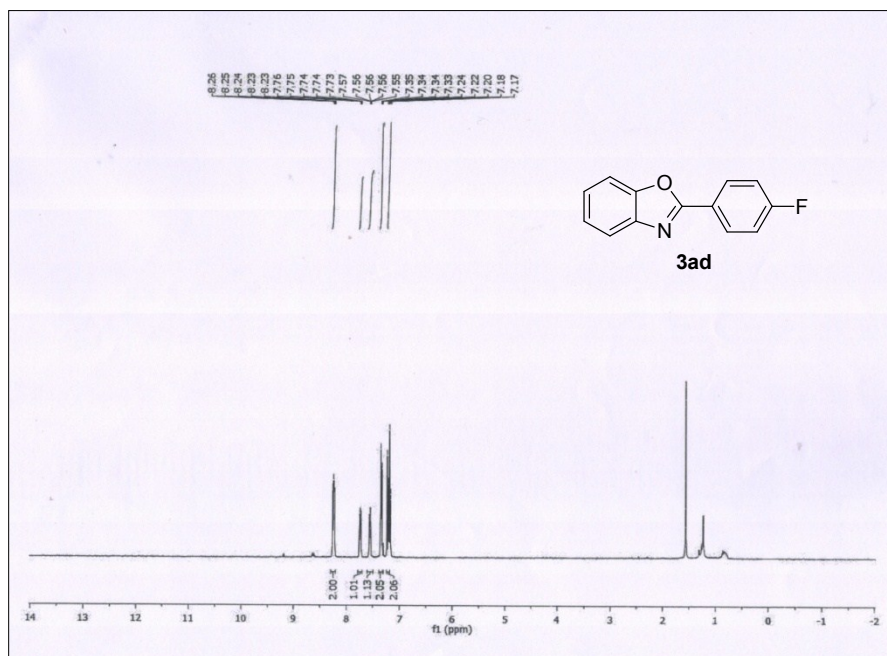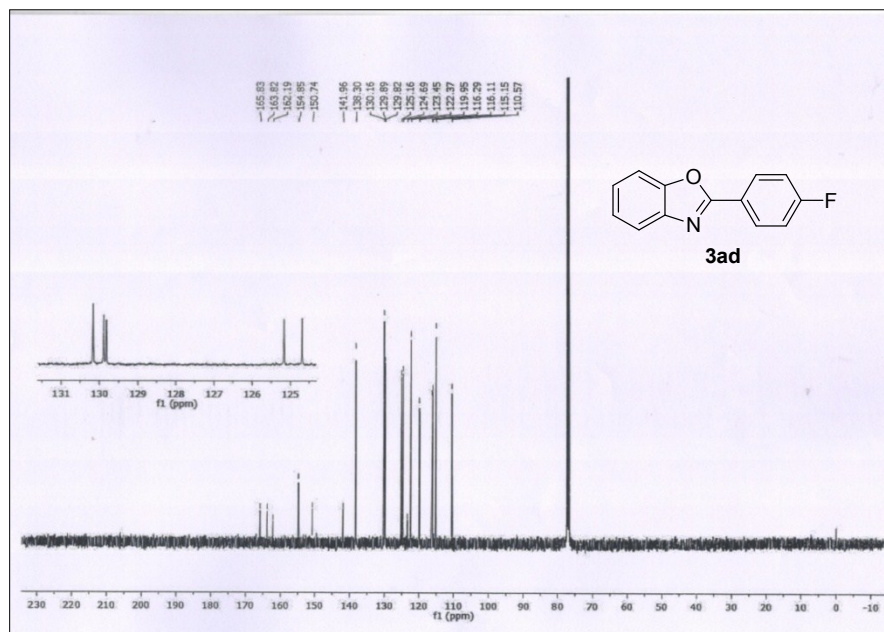

**<sup>1</sup>H NMR and <sup>13</sup>C NMR spectra of 2-methylbenzo[d]oxazole (3af).**

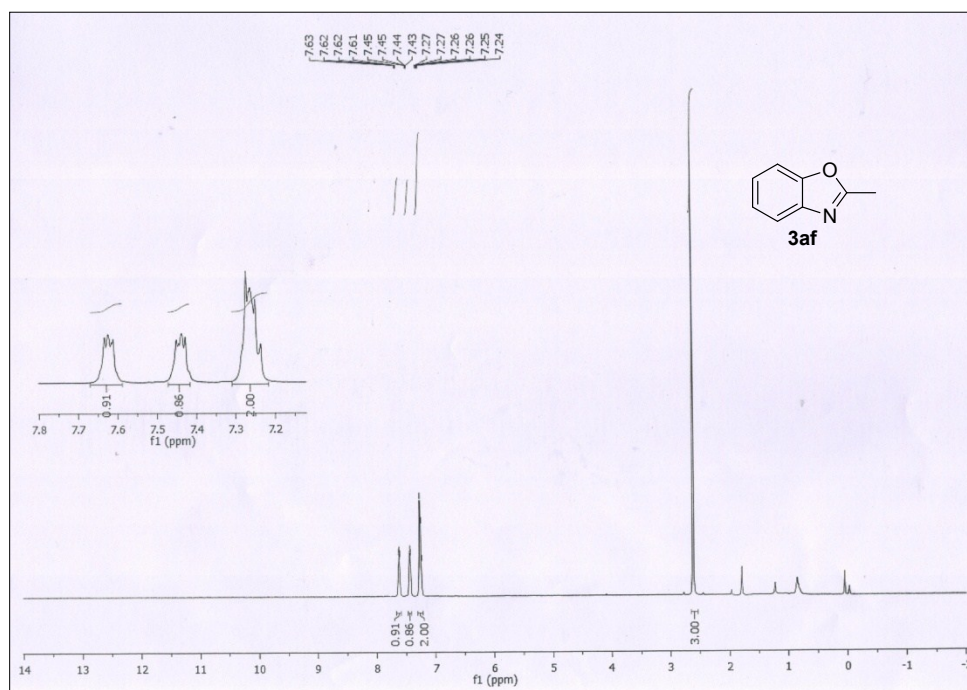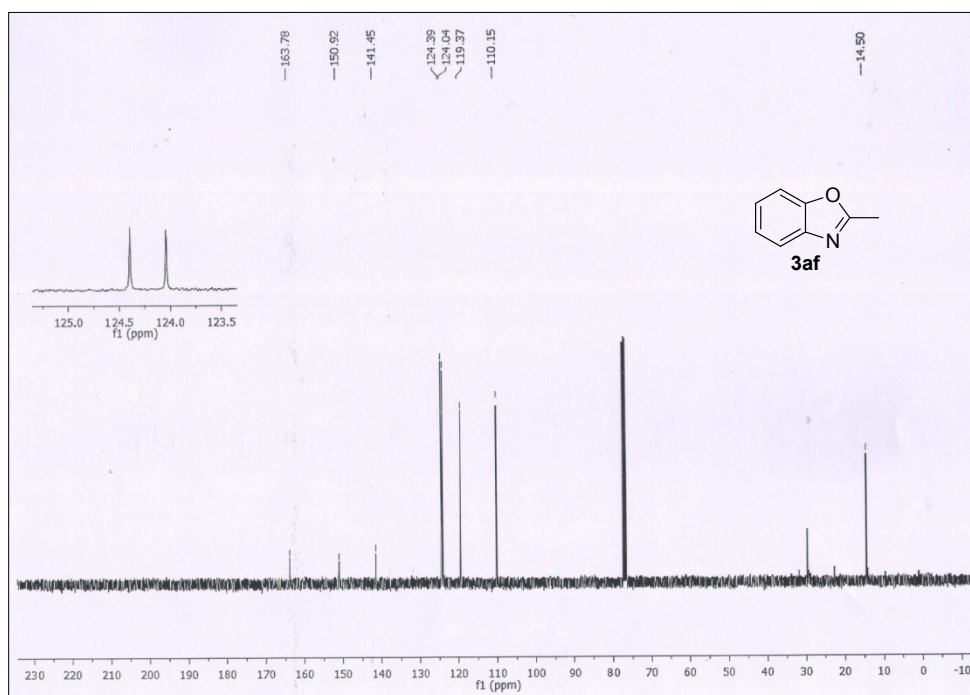

**<sup>1</sup>H NMR and <sup>13</sup>C NMR spectra of 2-cyclopropylbenzo[d]oxazole (3ag)**

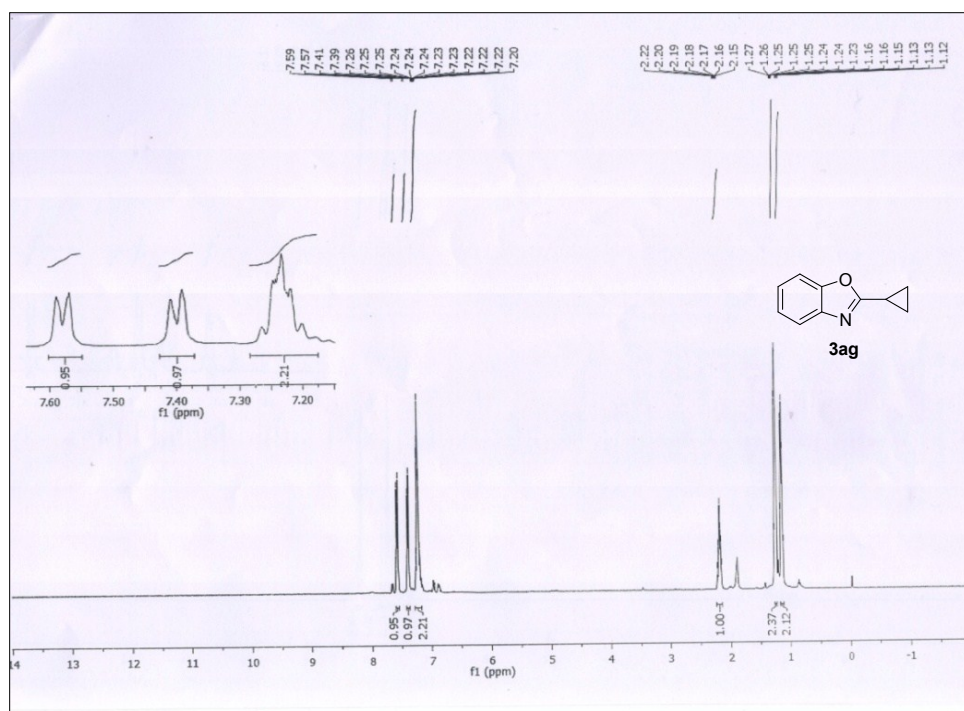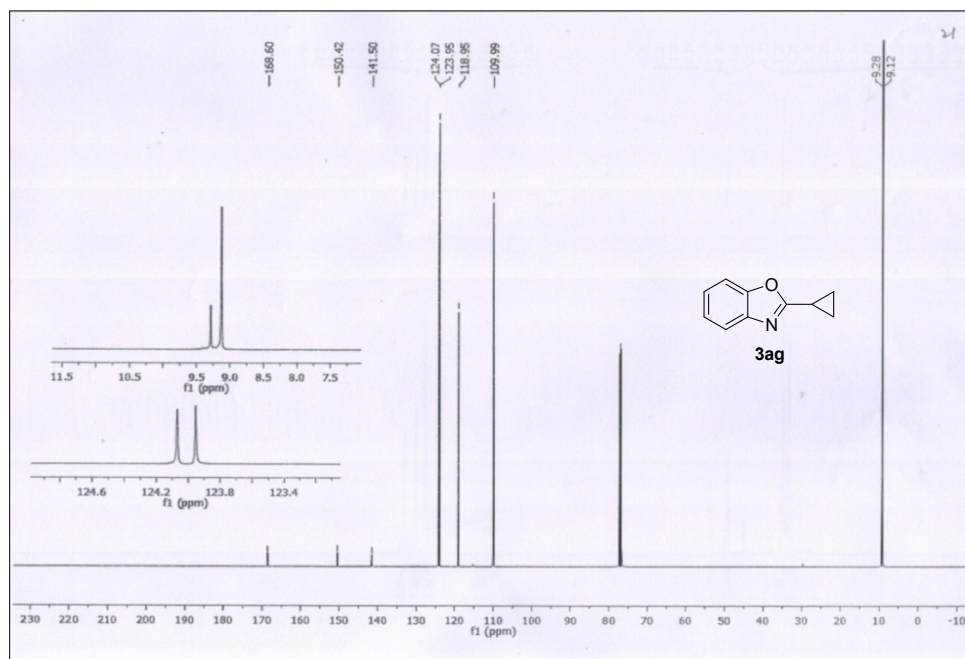



**<sup>1</sup>H NMR and <sup>13</sup>C NMR spectra of 5-methyl-2-p-tolylbenzo[d]oxazole (3cb)**

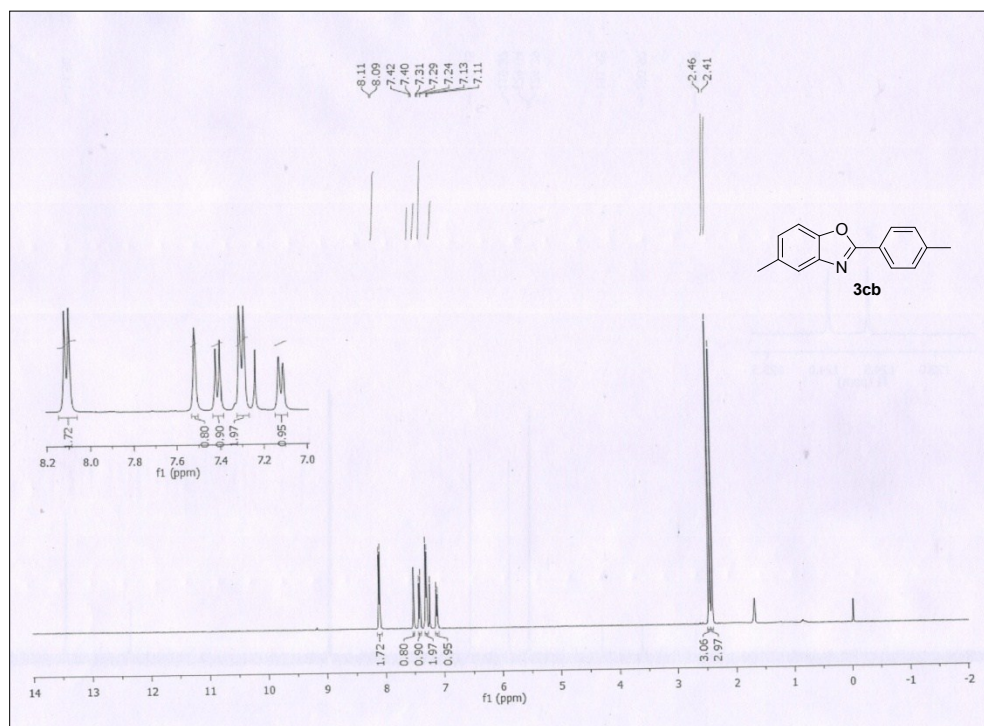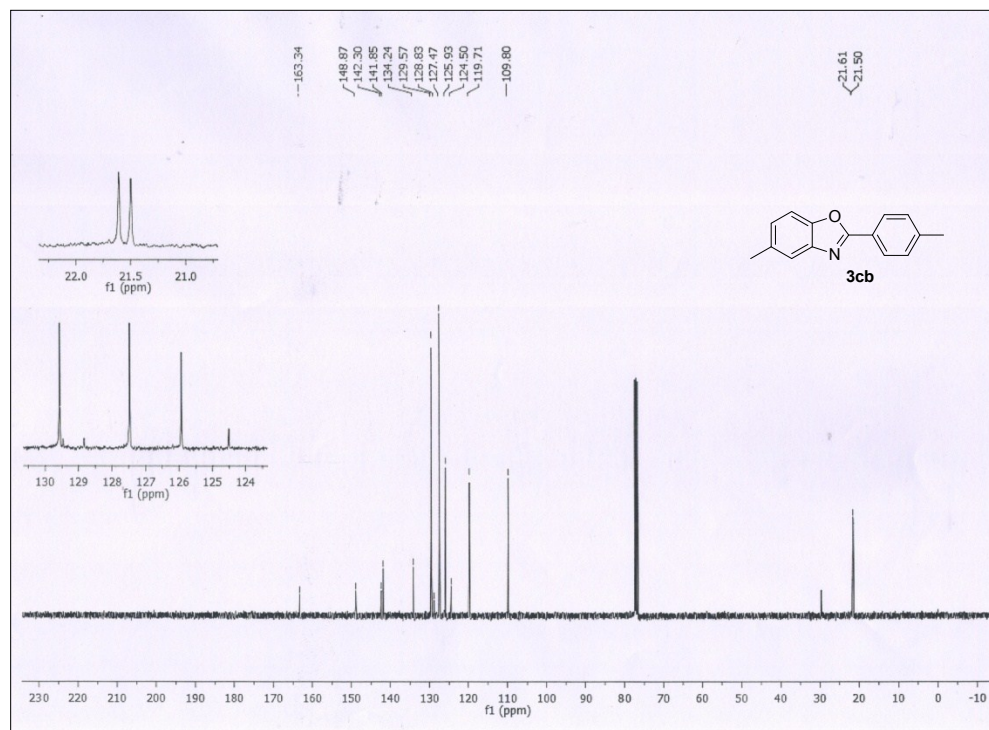

**<sup>1</sup>H NMR and <sup>13</sup>C NMR spectra of 2-(4-bromophenyl)-5-methylbenzo[d]oxazole (3cc)**

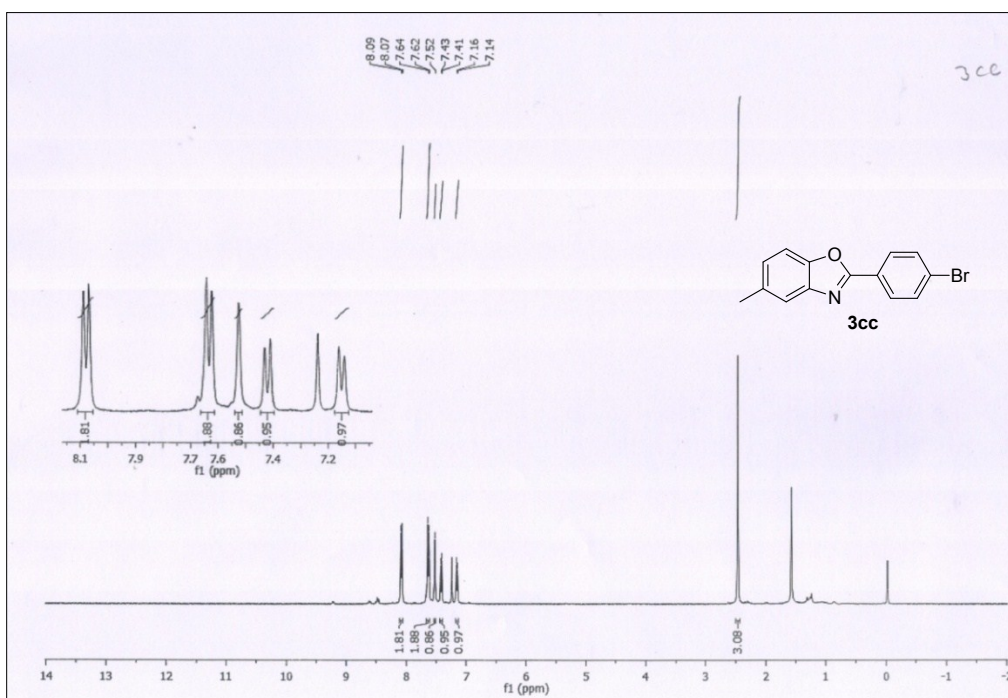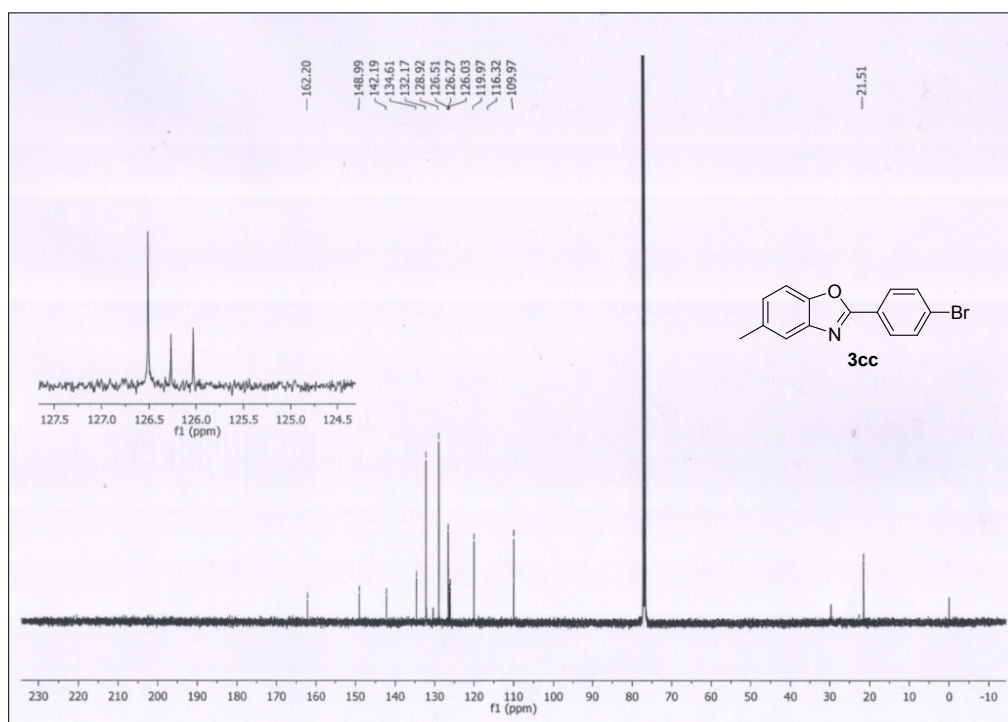

<sup>1</sup>H NMR and <sup>13</sup>C NMR spectra of 2-(4-fluorophenyl)-5-methylbenzo[d]oxazole (3cd)

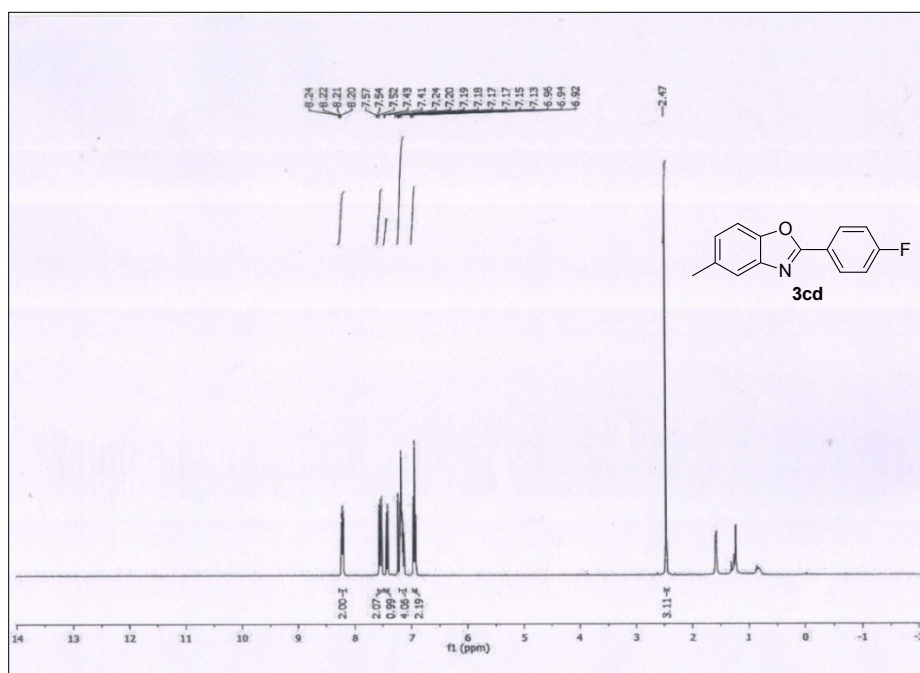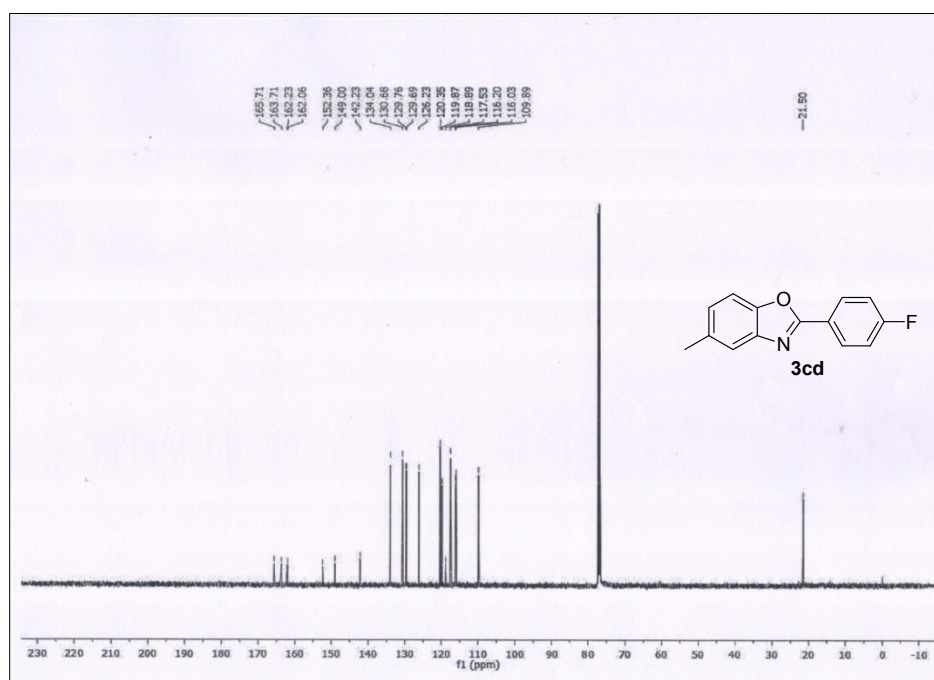



**<sup>1</sup>H NMR and <sup>13</sup>C NMR spectra of 5-bromo-2-(p-tolyl)benzo[d]oxazole (3db)**

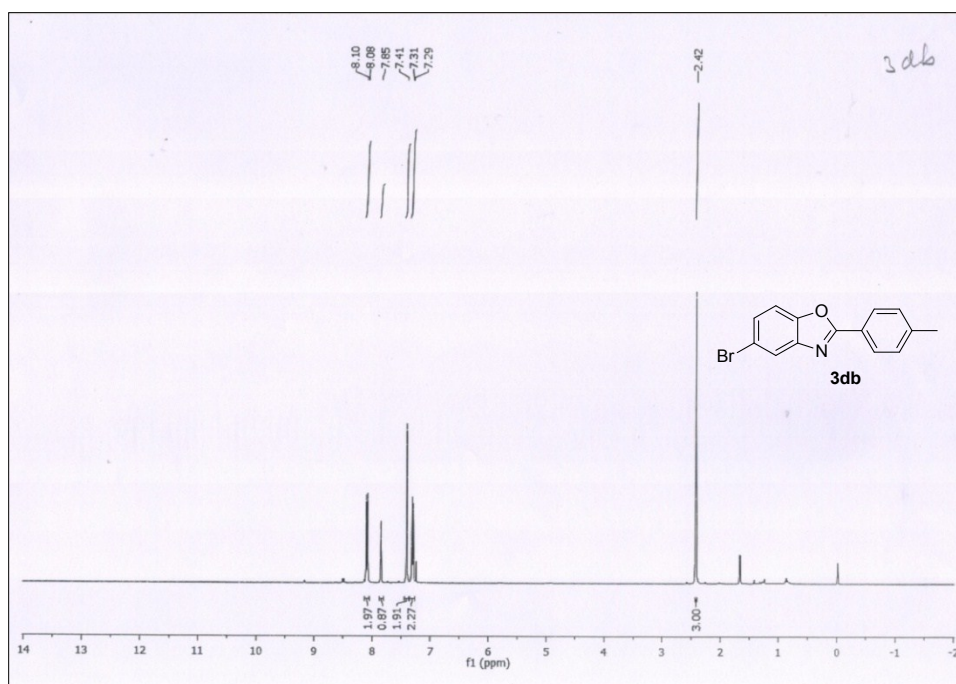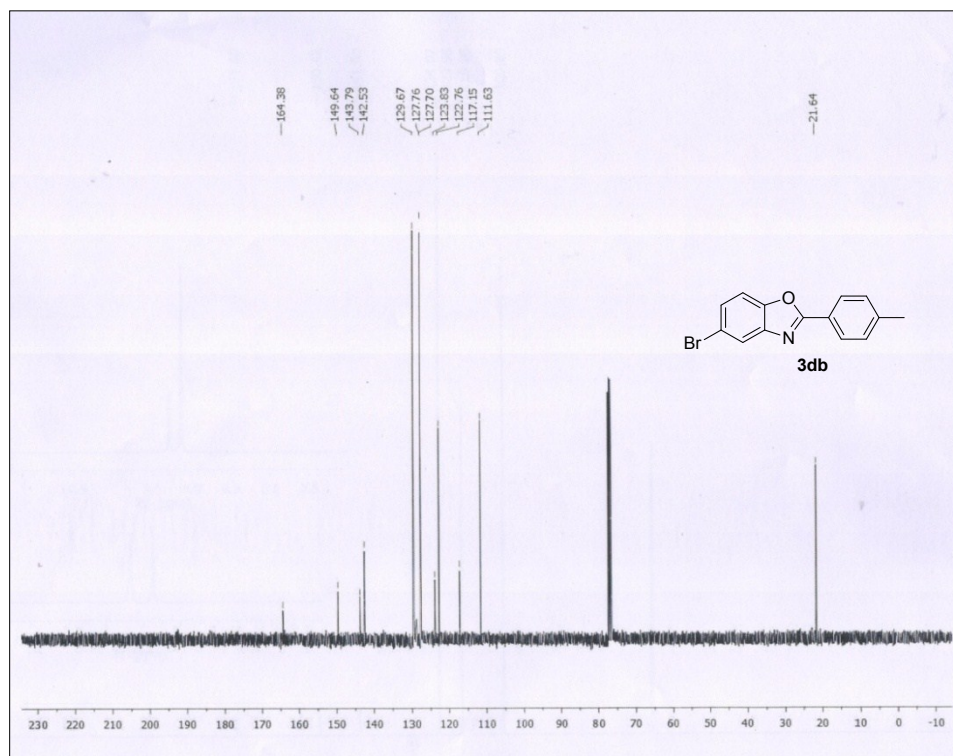

<sup>1</sup>H NMR and <sup>13</sup>C NMR spectra of 5-bromo-2-(4-bromophenyl)benzo[d]oxazole (3dc)

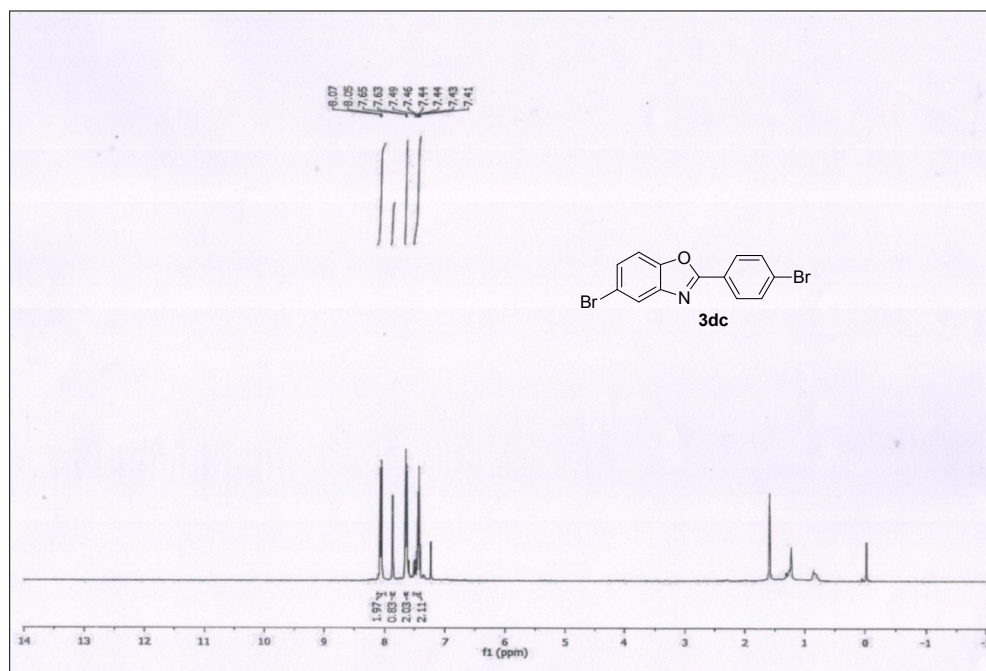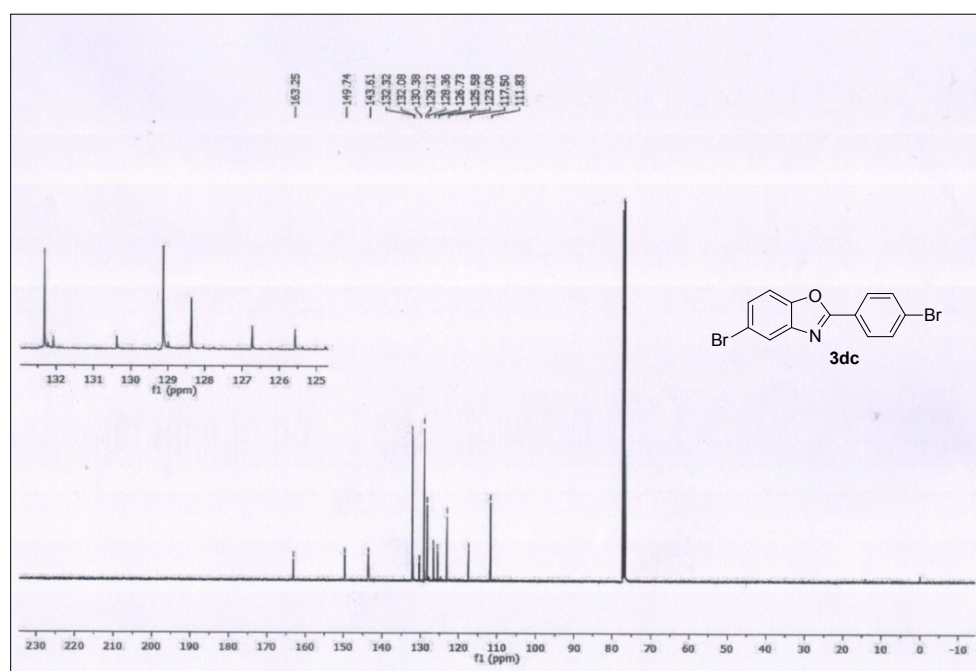

**<sup>1</sup>H NMR and <sup>13</sup>C NMR spectra of 5-chloro-2-p-tolylbenzo[d]oxazole (3hb)**

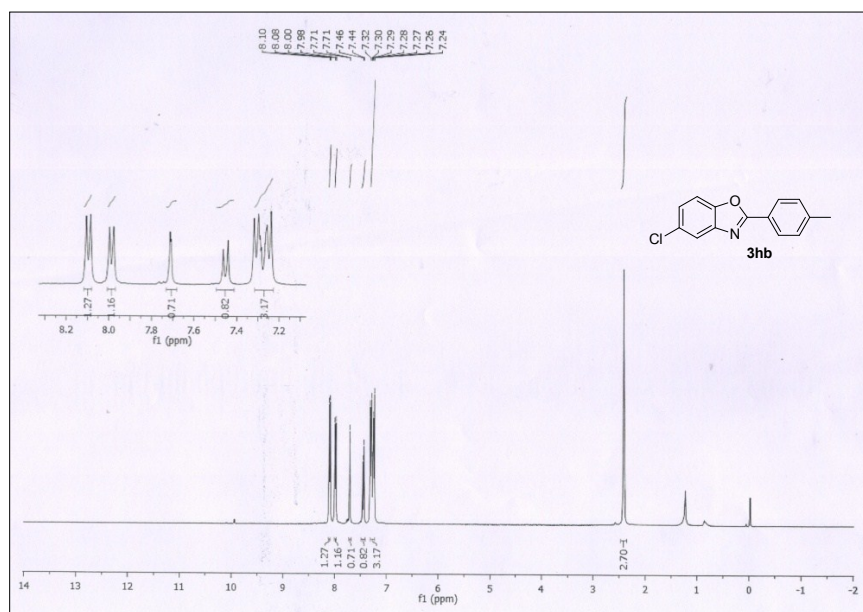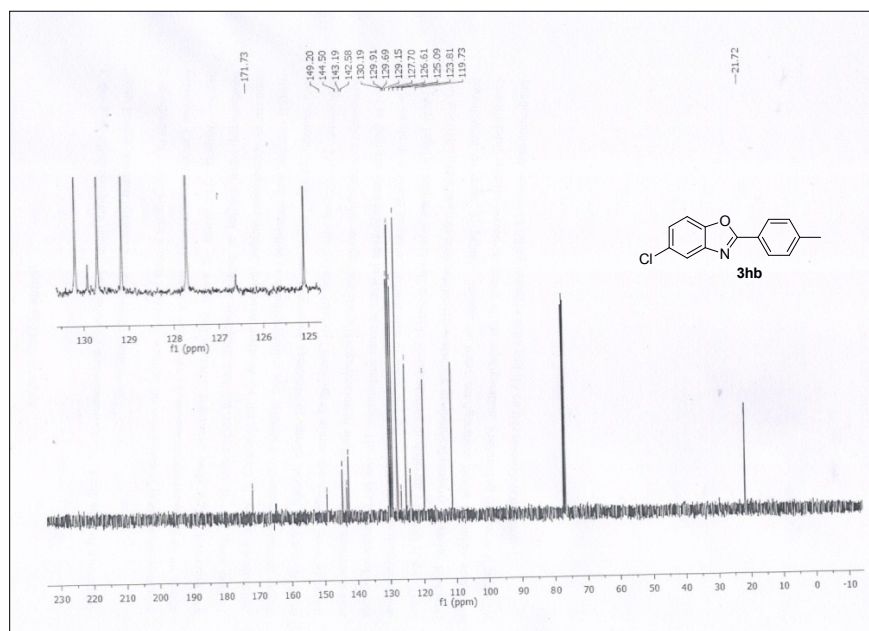



<sup>1</sup>H NMR and <sup>13</sup>C NMR spectra of 5-Fluoro-2-p-tolylbenzo[d]oxazole (3eb)

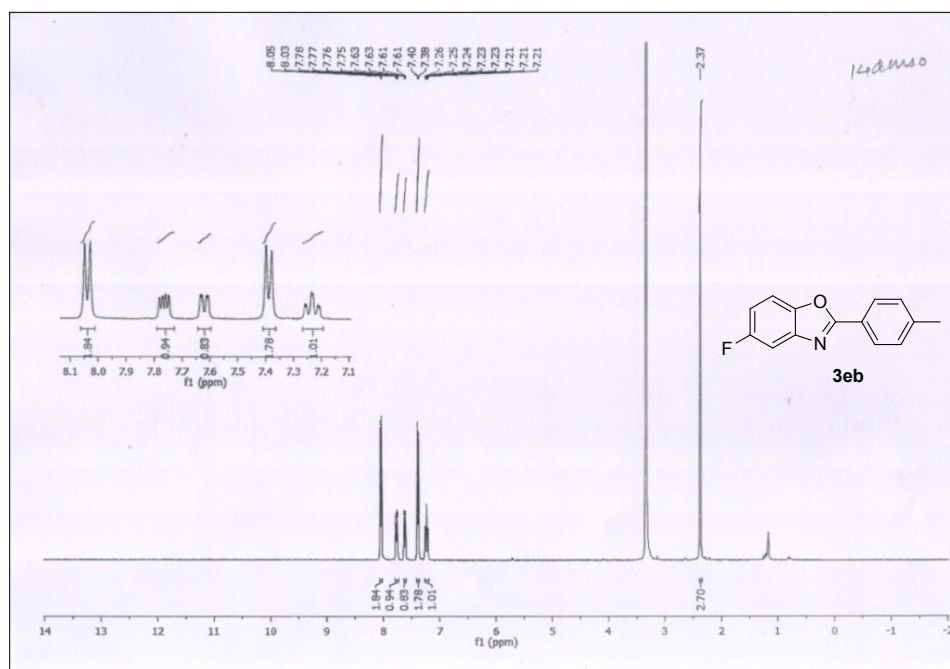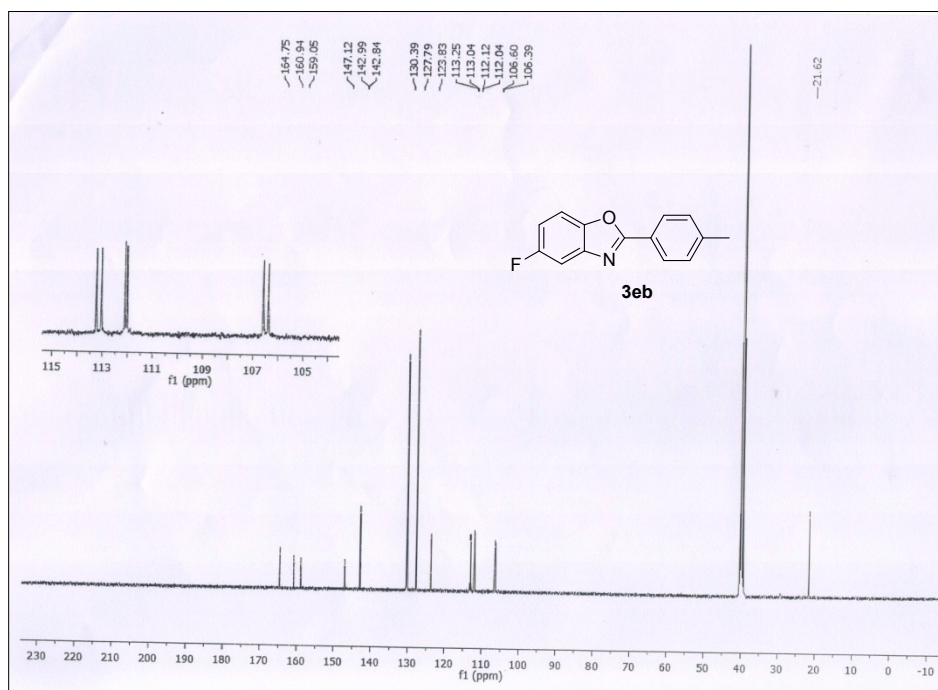

Supplement: c6ob01264g1.pdf [file c6ob01264g1.pdf]
